# Supplementary material
Source: publisher figshare collection journal article supplement (https://tandf.figshare.com/articles/dataset/_/4980539)
Supplement: Supplementary file 1 [file 1]

**Supplementary Table 1.** Inter-observer variability and intra-Interobserver variability among the researchers in the study in the first 20 women of the study.

|                                   | AP (cm)       | LR (cm)       | Hiatal area (cm <sup>2</sup> ) | Hiatal perimeter (cm) |
|-----------------------------------|---------------|---------------|--------------------------------|-----------------------|
| Researcher – 1                    | 5.47          | 3.93          | 15.31                          | 15.20                 |
| Researcher – 2                    | 5.27          | 3.95          | 15.16                          | 15.01                 |
| MEAN                              | 5.16          | 3.95          | 14.78                          | 14.65                 |
| Size                              | 20            | 20            | 20                             | 20                    |
| <u>Inter-observer variability</u> |               |               |                                |                       |
| IntraClass correlation            | 0.9221        | 0.7061        | 0.9051                         | 0.8697                |
| 95% CI                            | 0.8142-0.9684 | 0.3936-0.8724 | 0.7765-0.9613                  | 0.7006-0.9463         |
| <u>Intra-Observer variability</u> |               |               |                                |                       |
| IntraClass correlation            | 0.8973        | 0.7269        | 0.9066                         | 0.8978                |
| 95% CI                            | 0.7595-0.9581 | 0.4290-0.8822 | 0.7797-0.9620                  | 0.7604-0.9583         |

AP: Antero-Posterior levator hiatus diameter; LR: Transverse levator hiatus diameter; CI: confidence interval.
