# Supplementary material
Source: publisher figshare collection journal article supplement (https://tandf.figshare.com/articles/dataset/_/4980539)
Supplement: Supplementary file 2 [file 1]

**Supplementary Table 3.** Comparison of Levator Hiatus dimensions between 1<sup>st</sup>, 3<sup>rd</sup> trimester and post-delivery dimensions depending on the mode of delivery.

|                                |   | VD / No Trauma |                       |                       | VD / Trauma  |                       |                       | CS           |                       |                       |
|--------------------------------|---|----------------|-----------------------|-----------------------|--------------|-----------------------|-----------------------|--------------|-----------------------|-----------------------|
|                                |   | PostPartum     | 1 <sup>st</sup> Vs PP | 3 <sup>rd</sup> Vs PP | PostPartum   | 1 <sup>st</sup> Vs PP | 3 <sup>rd</sup> Vs PP | PostPartum   | 1 <sup>st</sup> Vs PP | 3 <sup>rd</sup> Vs PP |
| At rest                        | — |                |                       |                       |              |                       |                       |              |                       |                       |
| Hiatal area (cm <sup>2</sup> ) |   | 16.20 ± 3.81   | <b>0.015</b> †        | N.S.                  | 18.04 ± 2.72 | <b>&lt;0.001</b> †    | N.S.                  | 14.48 ± 6.52 | N.S.                  | N.S.                  |
| At max contraction             |   |                |                       |                       |              |                       |                       |              |                       |                       |
| Hiatal area (cm <sup>2</sup> ) |   | 12.51 ± 2.89   | <b>0.049</b> †        | N.S.                  | 14.70 ± 3.03 | <b>0.005</b> †        | N.S.                  | 10.82 ± 3.33 | N.S.                  | <b>0.005</b> ‡        |
| At max Valsalva                |   |                |                       |                       |              |                       |                       |              |                       |                       |
| Hiatal area (cm <sup>2</sup> ) |   | 19.42 ± 6.45   | <b>&lt;0.001</b> †    | N.S.                  | 20.23 ± 5.34 | <b>0.014</b> †        | N.S.                  | 14.91 ± 8.05 | N.S.                  | <b>0.004</b> ‡        |

PP=Post Partum, †=statistically significant increase, ‡=statistically significant decrease, N.S.=Non significant
