# Supplementary material
Source: publisher figshare collection journal article supplement (https://tandf.figshare.com/articles/dataset/_/4980539)
Supplement: Supplementary file 3 [file 1]

**Supplementary Table 2.** Demographic, somatometric, delivery and neonatal data of the subgroups of the study.

|                       | Total                    | VD / no trauma          | VD/ trauma             | CS                     |
|-----------------------|--------------------------|-------------------------|------------------------|------------------------|
| n                     | 84                       | 29                      | 6                      | 24                     |
| Age                   | 30.39 ( $\pm 4.50$ )     | 29.10 ( $\pm 3.90$ )    | 30.17 ( $\pm 3.97$ )   | 32 ( $\pm 4.93$ )      |
| Height                | 164.58 ( $\pm 5.43$ )    | 165.15 ( $\pm 4.52$ )   | 162.67 ( $\pm 7.89$ )  | 164.41 ( $\pm 5.80$ )  |
| Weight                | 66.63 ( $\pm 15.21$ )    | 65.48 ( $\pm 11.70$ )   | 56.33 ( $\pm 7.71$ )   | 70.58 ( $\pm 18.92$ )  |
| Gestational age       | 38.66 ( $\pm 1.71$ )     | 39.10 ( $\pm 0.98$ )    | 39.17 ( $\pm 0.75$ )   | 38.0 ( $\pm 2.30$ )    |
| Birth weight          | 3143.78 ( $\pm 382.36$ ) | 3155.5 ( $\pm 334.18$ ) | 3135.0 ( $\pm 527.4$ ) | 3134.2 ( $\pm 404.7$ ) |
| Vaginal delivery (VD) | 35/59 (62.5%)            | 29/29 (100.0%)          | 6/6 (100.0%)           | N/A                    |
| Cesarean section (CS) | 24/59 (37.5%)            | N/A                     | N/A                    | 24/24 (100.0%)         |
| Elective CS           | 12/24 (50.0%)            | N/A                     | N/A                    | 12/24 (50.0%)          |
| 1st stage CS          | 9/24 (37.5%)             | N/A                     | N/A                    | 12/24 (50.0%)          |
| 2nd stage CS          | 3/24 (12.5%)             | N/A                     | N/A                    | N/A                    |
| Prolonged 2nd stage   | 0/65 (0.0%)              | N/A                     | N/A                    | N/A                    |
| Instrumental delivery | 5/35 (14.3%)             | 5/29 (17.24%)           | 1/6 (16.7%)            | N/A                    |
| Perineal tear         | 1/35 (2.8%)              | 1/29 (3.44%)            | 1/6 (16.7%)            | N/A                    |
| Perineotomy           | 29/35 (74.3%)            | 24/29 (82.75%)          | 3/6 (50.0%)            | N/A                    |

VD=Vaginal Delivery, CS=Cesarean section, N/A=Non Applicable
