# Supplementary material
Source: publisher figshare collection journal article supplement (https://tandf.figshare.com/articles/dataset/_/4980539)
Supplement: Supplementary file 4 [file 1]

Archive with 3 entries (3 files):
- IJMF_1319926_SuppTable1.pdf
- IJMF_1319926_SuppTable2.pdf
- IJMF_1319926_SuppTable3.pdf
